# Supplementary material for: Alberta Childhood Cancer Survivorship Research Program
Source: MDPI journal article supplement (doi:10.3390/cancers15153932), 2023-08-02
Supplement: s1 [file s1]

**Supplementary Table S1:** All chemotherapy agents available for 1,419 survivors of childhood cancer

| Chemotherapy Agent                                                          | Count | Percentage |
|-----------------------------------------------------------------------------|-------|------------|
| Anti-rejection drugs (Sirolimus Tacrolimus MMF)                             | 13    | 0.1        |
| Antithymocyte globulin [ATG/ATGAM]                                          | 2     | < 0.1      |
| Arsenic trioxide (Trisinox)                                                 | 4     | < 0.1      |
| Asparaginase E-Coli (L-Asp) Elspar Kidrolase                                | 125   | 1.2        |
| Asparaginase Erwinia (Erwinase)                                             | 56    | 0.5        |
| Asparaginase Peg                                                            | 355   | 3.4        |
| Azacytidine (Aza-C) 5-AZA 5-AC 5-azacytidine)                               | 2     | < 0.1      |
| Bevacizumab (Avastin)                                                       | 4     | < 0.1      |
| Bleomycin Blenoxane Bleo*                                                   | 96    | 0.9        |
| Blinatumomab                                                                | 1     | < 0.1      |
| Bortezomib (Velcade)                                                        | 2     | < 0.1      |
| Brentuximab vedotin (SGN-35)                                                | 5     | < 0.1      |
| Busulphan Busulfan (Myleran)*                                               | 4     | < 0.1      |
| Carboplatin CBDCA Paraplatin Carboplatinum                                  | 208   | 2          |
| Carmustine (BCNU) Bis-Chloroethyl-Nitrosourea BiCNU*                        | 2     | < 0.1      |
| Ch14.18 (Dinutuximab)                                                       | 13    | 0.1        |
| Cisplatin CDDP Platinol Cisplatinum Cis-diamminedicloro-platinum II P*      | 232   | 2.2        |
| Cladribine CdA Leustatin                                                    | 4     | < 0.1      |
| Clofarabine Clolar                                                          | 13    | 0.1        |
| Colony stimulating factors/Erythropoietin (e.g., G-CSF Eprex Aransep)       | 384   | 3.7        |
| Crizotinib                                                                  | 2     | < 0.1      |
| Cyclophosphamide Cytoxan CTX Procytox*                                      | 836   | 8.1        |
| Cyclosporin                                                                 | 55    | 0.5        |
| Cytarabine (IM sub q PO OR IV) Ara-C Cytosar Cytosine arabinoside           | 435   | 4.2        |
| Cytarabine (IT ONLY) Ara-C Cytosar Cytosine arabinoside                     | 556   | 5.4        |
| Cytarabine (ONLY IV >=500mg/m2 per dose) Ara-C Cytosar Cytosine arabinoside | 146   | 1.4        |
| Dabrafenib                                                                  | 2     | < 0.1      |
| Dactinomycin (DACT) Actinomycin D Cosmogen Act-D                            | 154   | 1.5        |
| Dasatinib (BMS-354825)                                                      | 6     | 0.1        |
| Daunomycin Daunorubicin Cerubidine DNR*                                     | 299   | 2.9        |
| Dexamethasone (Decadron)                                                    | 474   | 4.6        |
| Dexrazoxane Zinecard Cardioxane                                             | 24    | 0.2        |
| Docetaxel (Taxotere)                                                        | 4     | < 0.1      |
| Dolastatin 10 (D10)                                                         | 1     | < 0.1      |
| Doxorubicin Adriamycin ADR*                                                 | 785   | 7.6        |
| Doxorubicin-pegylated liposomal (DOXIL) PLD*                                | 4     | < 0.1      |
| Erlotinib Tarceva OSI-774                                                   | 3     | < 0.1      |
| Etoposide (VP16) VePesid ETOP*                                              | 563   | 5.4        |
| Etoposide phosphate                                                         | 3     | < 0.1      |
| Fludarabine FAMP Fludara                                                    | 30    | 0.3        |
| Fluorouracil (5-FU Adrucil Efudex Fluoroplex 5-fluorouracil)                | 35    | 0.3        |
| Gamma globulin                                                              | 68    | 0.7        |

| Chemotherapy Agent                                            | Count | Percentage |
|---------------------------------------------------------------|-------|------------|
| Gemcitabine (Gemzar)                                          | 12    | 0.1        |
| Gemtuzumab (Mylotarg)                                         | 6     | 0.1        |
| Hu14.18-IL2                                                   | 2     | < 0.1      |
| Hydrocortisone (IT ONLY)                                      | 112   | 1.1        |
| Hydroxyurea Hydroxycarbamide Hydrea                           | 6     | 0.1        |
| Idarubicin Idamycin 4-Demethoxydaunorubicin*                  | 28    | 0.3        |
| Ifosfamide Isophosphamide IFOS Ifex Holoxan*                  | 217   | 2.1        |
| Imatinib (Gleevec) IMAT                                       | 11    | 0.1        |
| Inotuzumab                                                    | 1     | < 0.1      |
| Interferon                                                    | 2     | < 0.1      |
| Interleukin-2                                                 | 11    | 0.1        |
| Irinotecan (CPT-11) Camptosar                                 | 52    | 0.5        |
| Isotretinoin 13-cis-Retinoic Acid                             | 44    | 0.4        |
| Ixabepilone                                                   | 1     | < 0.1      |
| Lestaurtinib (CEP-701)                                        | 1     | < 0.1      |
| Lomustine (CCNU) CeeNU Chloroethyl-Cyclohexyl-Nitrosurea*     | 20    | 0.2        |
| Melphalan L-PAM Alkeran L-sarcosine*                          | 5     | < 0.1      |
| Mercaptopurine (6-MP Purinethol 6-mercaptopurine              | 433   | 4.2        |
| Methotrexate (IM PO Sub q IC OR IV<500mg/m2) MTX amethopterin | 428   | 4.1        |
| Methotrexate (IT ONLY) MTX amethopterin                       | 558   | 5.4        |
| Methotrexate (IV >=500mg/m2 ONLY) MTX amethopterin*           | 354   | 3.4        |
| Mitotane Lysodren                                             | 2     | < 0.1      |
| Mitoxantrone Novantrone DHAD Dihydrochloride*                 | 57    | 0.6        |
| Nelarabine (Arranon AraG)                                     | 13    | 0.1        |
| Nimotuzumab                                                   | 2     | < 0.1      |
| Other                                                         | 28    | 0.3        |
| Oxaliplatin Eloxatin                                          | 4     | < 0.1      |
| Paclitaxel Taxol                                              | 4     | < 0.1      |
| Pembrolizumab                                                 | 1     | < 0.1      |
| Prednisone (Methylprednisone Prednisolone)                    | 376   | 3.6        |
| Procarbazine PCB Natulan Matulane*                            | 7     | 0.1        |
| Rituximab Rituxan                                             | 24    | 0.2        |
| Sorafenib BAY 43-9006 Nexavar                                 | 8     | 0.1        |
| Tamoxifen Tam Nolvadex                                        | 2     | < 0.1      |
| Temozolomide TMZ Temodal                                      | 52    | 0.5        |
| Teniposide (Vumon) VM-26*                                     | 21    | 0.2        |
| Thioguanine (6-TG Lanvis 6-thioguanine)                       | 304   | 2.9        |
| Thiotepa TESP Triethylene Thiophosphoramide*                  | 12    | 0.1        |
| Topotecan (Hycamtin)                                          | 60    | 0.6        |
| Trametinib                                                    | 2     | < 0.1      |
| Tretinoin ATRA all-trans-Retinoic acid Vesanoid               | 8     | 0.1        |
| Vinblastine Velbe Velban VLB                                  | 57    | 0.6        |
| Vincristine Leurocristine Oncovin VCR                         | 974   | 9.4        |

| Chemotherapy Agent    | Count | Percentage |
|-----------------------|-------|------------|
| Vinorelbine Navelbine | 20    | 0.2        |
| Vorinostat            | 1     | < 0.1      |

\* Presented data based on treatment information available as of May 4<sup>th</sup>, 2022 (for Alberta Children's Hospital) and November 30<sup>th</sup>, 2022 (for Stollery Children's Hospital).
